# Supplementary material for: Study of Some Strategies for Disposal of the GNSS Satellites
Source: Hindawi journal article supplement (doi:10.1155/2015/382340), 2015-01-01
Supplement: f1 [file 382340.f1.pdf]

TABLE 2: The initial conditions of the active GNSS satellites for the epoch April 18, 2012, presenting the identification of the satellite (US catalog number and name), semimajor axis ( $a$ ), eccentricity ( $e$ ), inclination ( $I$ ), longitude of the ascending node ( $\Omega$ ), argument of perigee ( $\omega$ ), and mean anomaly ( $l$ ). The US catalog number is the same number of the NORAD catalog.

| Satellite ID               | $a$ [km]    | $e$     | $I$ [deg] | $\Omega$ [deg] | $\omega$ [deg] | $l$ [deg] |
|----------------------------|-------------|---------|-----------|----------------|----------------|-----------|
| 20959 GPS BIIA-10 (PRN 32) | 26560.76605 | 0.01194 | 54.5454   | 241.1649       | 325.2920       | 33.8961   |
| 22014 GPS BIIA-14 (PRN 26) | 26560.16349 | 0.02070 | 56.3669   | 301.0373       | 67.8160        | 294.3814  |
| 22108 GPS BIIA-15 (PRN 27) | 26561.12027 | 0.02202 | 56.2641   | 353.9700       | 296.8058       | 61.0016   |
| 22700 GPS BIIA-21 (PRN 09) | 26559.82731 | 0.01714 | 56.4089   | 355.4836       | 92.3821        | 269.6143  |
| 22779 GPS BIIA-22 (PRN 30) | 26559.98507 | 0.01074 | 54.9727   | 50.3441        | 89.3106        | 271.8936  |
| 22877 GPS BIIA-23 (PRN 04) | 26559.47428 | 0.00982 | 53.7281   | 176.1439       | 47.6428        | 313.2418  |
| 23027 GPS BIIA-24 (PRN 06) | 26560.59892 | 0.00734 | 53.7368   | 112.8676       | 325.5167       | 34.0429   |
| 23833 GPS BIIA-25 (PRN 03) | 26560.76155 | 0.01493 | 53.3418   | 108.4962       | 67.5763        | 294.0258  |
| 23953 GPS BIIA-26 (PRN 10) | 26560.51046 | 0.01110 | 54.2158   | 237.3339       | 42.3080        | 318.5046  |
| 24876 GPS BIIR-2 (PRN 13)  | 26560.51152 | 0.00471 | 56.5076   | 301.3609       | 113.5217       | 246.9874  |
| 25030 GPS BIIA-28 (PRN 08) | 26560.50772 | 0.01216 | 57.1768   | 1.7212         | 191.1965       | 168.5625  |
| 25933 GPS BIIR-3 (PRN 11)  | 26560.46931 | 0.01263 | 50.8831   | 160.5785       | 59.3065        | 302.0055  |
| 26360 GPS BIIR-4 (PRN 20)  | 26560.94351 | 0.00485 | 53.3143   | 233.6311       | 73.2390        | 287.2615  |
| 26407 GPS BIIR-5 (PRN 28)  | 26560.69833 | 0.01812 | 56.0681   | 58.9335        | 255.5129       | 102.4490  |
| 26605 GPS BIIR-6 (PRN 14)  | 26559.28757 | 0.00637 | 56.1005   | 299.8538       | 243.2761       | 116.0784  |
| 26690 GPS BIIR-7 (PRN 18)  | 26560.47700 | 0.01323 | 53.2893   | 236.6979       | 235.4110       | 123.2997  |
| 27663 GPS BIIR-8 (PRN 16)  | 26560.04758 | 0.00660 | 56.1622   | 58.5327        | 355.2423       | 4.6666    |
| 27704 GPS BIIR-9 (PRN 21)  | 26559.97660 | 0.01909 | 53.3659   | 176.4938       | 230.6459       | 127.7068  |
| 28129 GPS BIIR-10 (PRN 22) | 26560.50101 | 0.00607 | 53.1581   | 236.9148       | 245.9183       | 113.4118  |
| 28190 GPS BIIR-11 (PRN 19) | 26561.32838 | 0.00807 | 55.0126   | 121.1995       | 6.8089         | 353.3462  |
| 28361 GPS BIIR-12 (PRN 23) | 26560.11909 | 0.00773 | 55.0416   | 296.9056       | 188.5482       | 171.3252  |
| 28474 GPS BIIR-13 (PRN 02) | 26560.35825 | 0.01118 | 53.7831   | 175.1699       | 199.4560       | 160.1666  |
| 28874 GPS BIIRM-1 (PRN 17) | 26560.20084 | 0.00748 | 55.1631   | 118.1868       | 229.0088       | 130.3835  |
| 29486 GPS BIIRM-2 (PRN 31) | 26559.76384 | 0.00810 | 56.2002   | 357.1638       | 308.6808       | 50.6301   |
| 29601 GPS BIIRM-3 (PRN 12) | 26558.94206 | 0.00394 | 56.1119   | 57.5001        | 355.4301       | 4.5151    |
| 32260 GPS BIIRM-4 (PRN 15) | 26559.00138 | 0.00438 | 54.2008   | 294.9063       | 359.9041       | 0.0971    |
| 32384 GPS BIIRM-5 (PRN 29) | 26559.66947 | 0.00254 | 55.1922   | 118.6307       | 290.8636       | 68.9092   |
| 32711 GPS BIIRM-6 (PRN 07) | 26559.71493 | 0.00521 | 55.9088   | 356.9812       | 189.6439       | 170.2904  |
| 35752 GPS BIIRM-8 (PRN 05) | 26559.93917 | 0.00262 | 54.5104   | 236.0808       | 12.2377        | 347.7894  |
| 36585 GPS BIIF-1 (PRN 25)  | 26560.98360 | 0.00135 | 55.4730   | 55.5546        | 27.1038        | 332.9427  |
| 37753 GPS BIIF-2 (PRN 01)  | 26560.17029 | 0.00052 | 55.0094   | 175.8938       | 9.0525         | 351.0152  |
| 28509 COSMOS 2413 (712)    | 25507.99400 | 0.00052 | 63.3431   | 244.4346       | 145.6901       | 66.0918   |
| 28915 COSMOS 2419 (714)    | 25508.11785 | 0.00178 | 64.8965   | 129.4190       | 340.5463       | 72.0616   |
| 29670 COSMOS 2425 (716)    | 25507.76115 | 0.00235 | 65.8460   | 8.1085         | 348.2693       | 39.3142   |
| 29671 COSMOS 2426 (717)    | 25507.91851 | 0.00160 | 65.8624   | 8.1742         | 165.7740       | 68.3202   |
| 29672 COSMOS 2424 (715)    | 25507.94421 | 0.00155 | 65.8477   | 8.1278         | 164.7920       | 299.1805  |
| 32275 COSMOS 2433 (720)    | 25507.98810 | 0.00047 | 64.9095   | 129.1380       | 271.2384       | 252.5335  |
| 32276 COSMOS 2432 (719)    | 25508.02082 | 0.00149 | 64.9224   | 129.1791       | 331.7142       | 155.3185  |
| 32393 COSMOS 2434 (721)    | 25507.95969 | 0.00038 | 65.4709   | 8.1310         | 97.6333        | 55.7476   |
| 32394 COSMOS 2435 (722)    | 25507.86912 | 0.00212 | 65.4742   | 8.1251         | 0.2504         | 105.2990  |
| 32395 COSMOS 2436 (723)    | 25507.93296 | 0.00186 | 65.4830   | 8.1524         | 354.7572       | 192.0330  |
| 33378 COSMOS 2442 (724)    | 25508.00781 | 0.00267 | 64.8241   | 128.6694       | 330.2945       | 123.8221  |
| 33379 COSMOS 2443 (725)    | 25507.98985 | 0.00199 | 64.8323   | 128.7216       | 190.8534       | 321.8305  |
| 33380 COSMOS 2444 (726)    | 25507.96799 | 0.00281 | 64.8408   | 128.7465       | 322.5419       | 27.9592   |
| 33466 COSMOS 2447 (727)    | 25508.01515 | 0.00021 | 64.1873   | 248.3265       | 264.7364       | 132.9052  |
| 33467 COSMOS 2449 (729)    | 25508.03063 | 0.00023 | 64.1760   | 248.2733       | 299.2114       | 74.7705   |
| 33468 COSMOS 2448 (728)    | 25508.06471 | 0.00041 | 64.1798   | 248.3152       | 327.9558       | 243.7852  |
| 36111 COSMOS 2456 (730)    | 25508.03239 | 0.00045 | 64.4154   | 248.4401       | 339.5272       | 27.1477   |

TABLE 2: Continued.

| Satellite ID                      | $a$ [km]    | $e$     | $I$ [deg] | $\Omega$ [deg] | $\omega$ [deg] | $l$ [deg] |
|-----------------------------------|-------------|---------|-----------|----------------|----------------|-----------|
| 36112 COSMOS 2457 (733)           | 25508.06072 | 0.00072 | 64.3969   | 248.4053       | 144.0316       | 260.8383  |
| 36113 COSMOS 2458 (734)           | 25508.02600 | 0.00026 | 64.4026   | 248.3892       | 53.2159        | 291.5204  |
| 36400 COSMOS 2459 (731)           | 25507.97381 | 0.00325 | 64.8090   | 128.5096       | 349.4180       | 11.8379   |
| 36401 COSMOS 2461 (735)           | 25507.96935 | 0.00027 | 64.8016   | 128.4959       | 80.2428        | 24.9760   |
| 36402 COSMOS 2460 (732)           | 25507.99672 | 0.00024 | 64.7918   | 128.4783       | 265.3795       | 198.6674  |
| 37137 COSMOS 2466 (738)           | 25507.97573 | 0.00204 | 65.0465   | 9.0692         | 152.0633       | 3.1840    |
| 37138 COSMOS 2465 (737)           | 25507.94836 | 0.00341 | 65.0625   | 9.1042         | 166.9321       | 337.0254  |
| 37139 COSMOS 2464 (736)           | 25507.95339 | 0.00222 | 65.0647   | 9.0715         | 12.8557        | 24.4004   |
| 37372 COSMOS 2471 (701K)          | 25507.41308 | 0.00070 | 64.8028   | 128.4335       | 249.1758       | 138.8823  |
| 37829 COSMOS 2474 (742)           | 25508.03247 | 0.00063 | 64.7336   | 248.2178       | 271.4956       | 124.9730  |
| 37867 COSMOS 2476 (744)           | 25508.03741 | 0.00152 | 64.7155   | 248.3493       | 263.4875       | 312.9414  |
| 37868 COSMOS 2477 (745)           | 25508.03366 | 0.00131 | 64.7233   | 248.3422       | 265.3620       | 114.7440  |
| 37869 COSMOS 2475 (743)           | 25508.02840 | 0.00195 | 64.7300   | 248.3245       | 284.4241       | 350.4016  |
| 37938 COSMOS 2478 (746)           | 25507.97270 | 0.00141 | 64.8216   | 128.6027       | 248.3220       | 225.8235  |
| 28922 GIOVE-A                     | 29716.46180 | 0.00079 | 56.2213   | 130.1371       | 359.0326       | 1.0273    |
| 32781 GIOVE-B                     | 29544.12728 | 0.00228 | 55.9161   | 164.4876       | 228.1809       | 131.6963  |
| 37846 GALILEO-PFM (GSAT0101)      | 29600.25776 | 0.00049 | 54.7324   | 124.8074       | 290.0592       | 69.9412   |
| 37847 GALILEO-FM2 (GSAT0102)      | 29600.22222 | 0.00060 | 54.7332   | 124.7907       | 280.2382       | 79.7480   |
| 26599 26599 2000-069A BEIDOU 1A   | 42551.78958 | 0.00200 | 3.4844    | 70.0244        | 266.1599       | 93.7374   |
| 26643 26643 2000-082A BEIDOU 1B   | 42453.69320 | 0.00838 | 4.4896    | 65.6045        | 317.7107       | 41.7041   |
| 27813 27813 2003-021A BEIDOU 1C   | 42165.86357 | 0.00134 | 1.4051    | 80.2039        | 359.9422       | 162.1483  |
| 30323 30323 2007-003A BEIDOU 1D   | 42482.29583 | 0.00557 | 1.7758    | 263.1685       | 339.3604       | 19.8511   |
| 31115 31115 2007-011A BEIDOU 2A   | 27910.13639 | 0.00043 | 56.6975   | 29.5987        | 210.5539       | 302.3601  |
| 34779 34779 2009-018A BEIDOU G2   | 42182.68822 | 0.00481 | 1.6384    | 71.5223        | 163.5239       | 197.0051  |
| 36287 36287 2010-001A BEIDOU G1   | 42164.45905 | 0.00027 | 1.5550    | 355.3111       | 165.0458       | 2.7948    |
| 36590 36590 2010-024A BEIDOU G3   | 42165.76657 | 0.00033 | 1.1444    | 352.7818       | 79.0950        | 155.4016  |
| 36828 36828 2010-036A BEIDOU IGSO | 42169.06132 | 0.00280 | 54.7511   | 212.2417       | 191.4996       | 202.3179  |
| 37210 37210 2010-057A BEIDOU G4   | 42165.13887 | 0.00060 | 0.7716    | 305.1317       | 138.2682       | 243.2195  |
| 37256 37256 2010-068A BEIDOU IGSO | 42167.94674 | 0.00208 | 54.9537   | 332.9232       | 175.3679       | 79.2272   |
| 37384 37384 2011-013A BEIDOU IGSO | 42165.81255 | 0.00212 | 55.6720   | 92.6995        | 191.2421       | 0.7374    |
| 37763 37763 2011-038A BEIDOU IGSO | 42168.61324 | 0.00215 | 55.0711   | 214.3362       | 173.4566       | 107.5842  |
| 37948 37948 2011-073A BEIDOU IGSO | 42160.96788 | 0.00182 | 55.0852   | 332.3159       | 180.9341       | 82.5926   |
| 38091 38091 2012-008A BEIDOU G5   | 42165.81619 | 0.00015 | 1.7894    | 300.4793       | 39.4195        | 273.8538  |
